# Supplementary material for: Attenuated Listeria monocytogenes reprograms M2-polarized tumor-associated macrophages in ovarian cancer leading to iNOS-mediated tumor cell lysis
Source: PubMed Central journal article supplement — Oncoimmunology. 2014 May 23;3:e28926. doi: 10.4161/onci.28926 (PMC4106169; doi:10.4161/onci.28926), 2014-05-23
Supplement: onci-3-e28926-s01.pdf [file onci-3-e28926-s01.pdf]

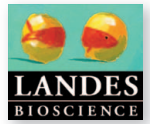

## **Supplemental Material to:**

**Patrick H Lizotte, Jason R Baird, Cynthia A Stevens,  
Peter Lauer, William R Green, Dirk G Brockstedt,  
and Steven Fiering**

**Attenuated *Listeria monocytogenes* reprograms M2-  
polarized tumor-associated macrophages in ovarian  
cancer leading to iNOS-mediated tumor cell lysis**

**Oncolmmunology 2014; 3(5)**

**<http://dx.doi.org/10.4161/onci.28926>**

**[http://www.landesbioscience.com/journals/oncoimmunology/  
article/28926/](http://www.landesbioscience.com/journals/oncoimmunology/article/28926/)**

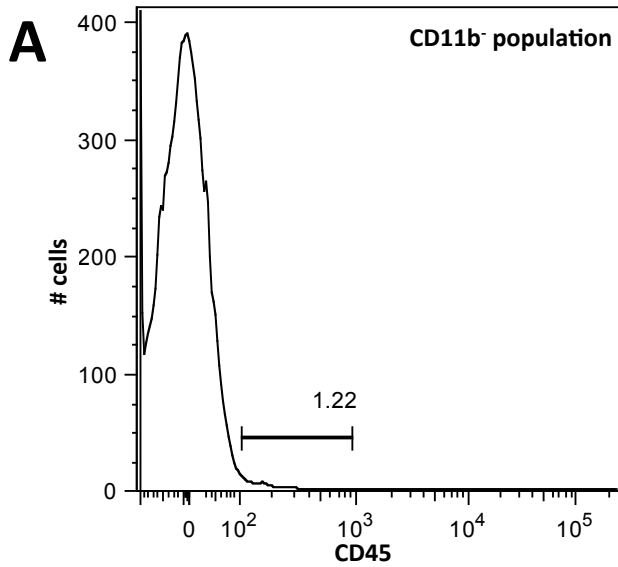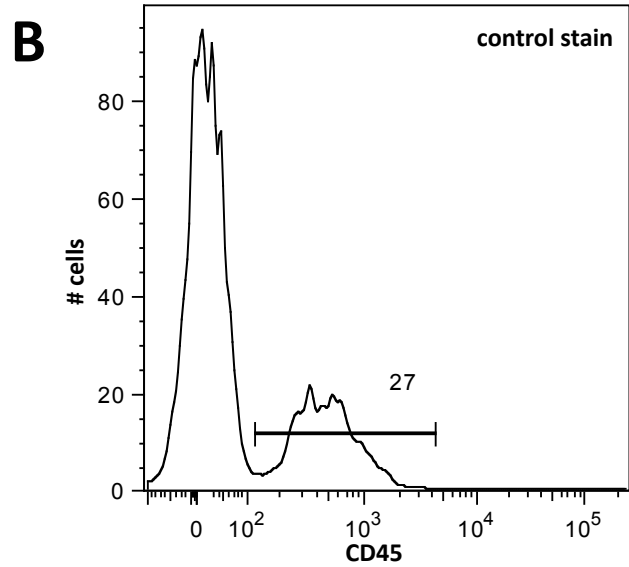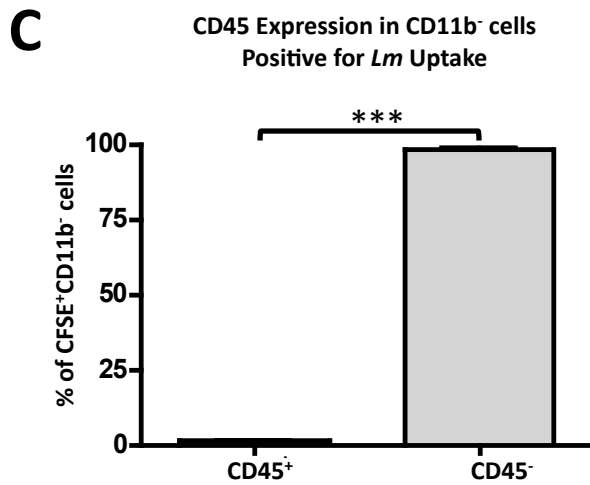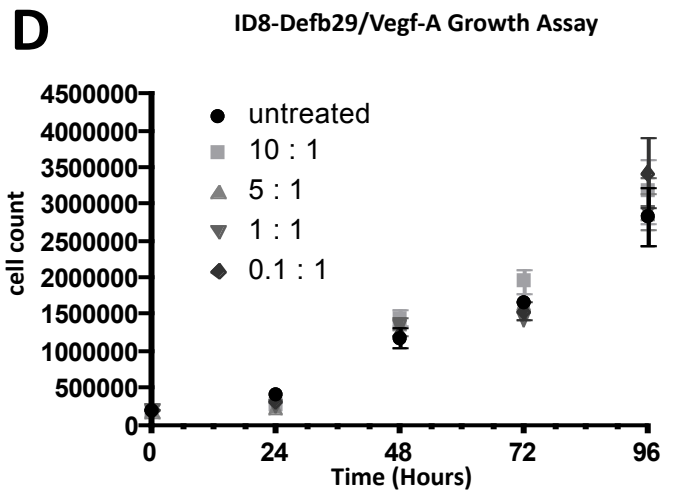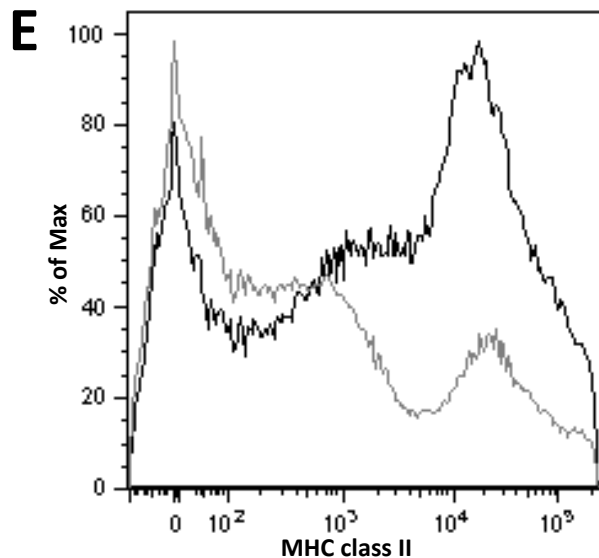

**Supplementary Figure S1.** *Lm* infection of ID8-Defb29/Vegf-A cells does not impact viability. (A-B) histogram of CD45 staining on CD11b<sup>-</sup> gate from Fig. 2B bottom panel (A) compared to control CD45 stain (B). (C) out of CD11b<sup>-</sup> cells that are positive for CFSE-labeled *Lm* uptake, ~98% are CD45<sup>-</sup> and are likely tumor cells (n = 4). (D) exposure to increasing MOI of *Lm* has no effect on growth of ID8-Defb29/Vegf-A cells *in vitro*. (E) representative histograms of MHC class-II surface expression on CD45<sup>+</sup>CD11b<sup>+</sup> ascites cells from tumor-bearing mice treated with *Lm* (black line) or untreated (gray line) overnight in culture.

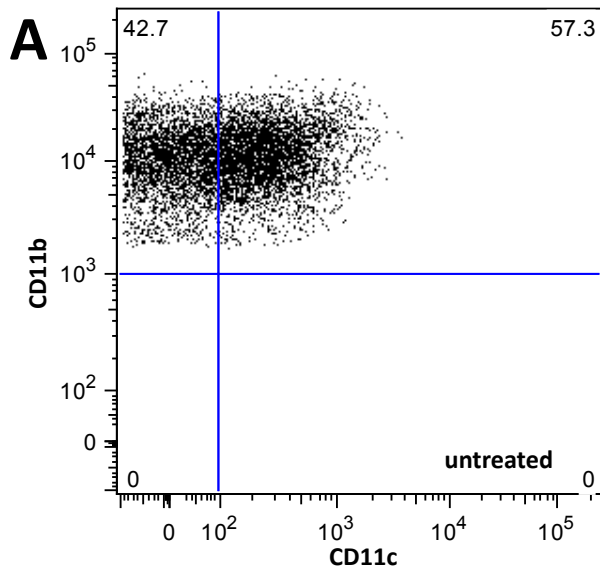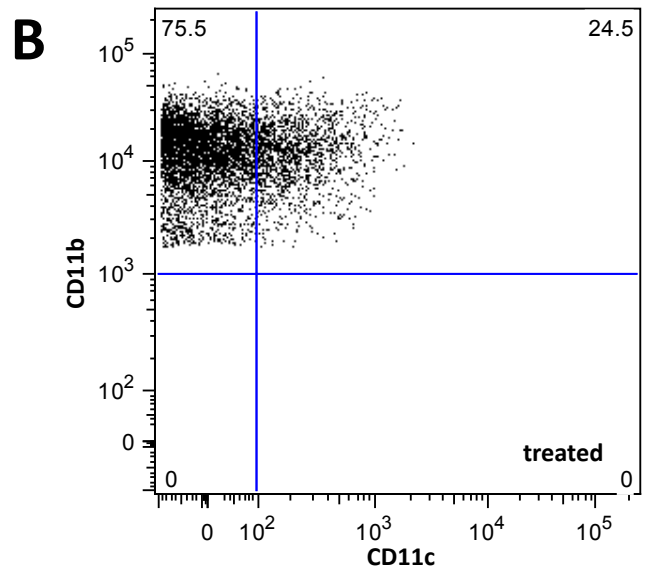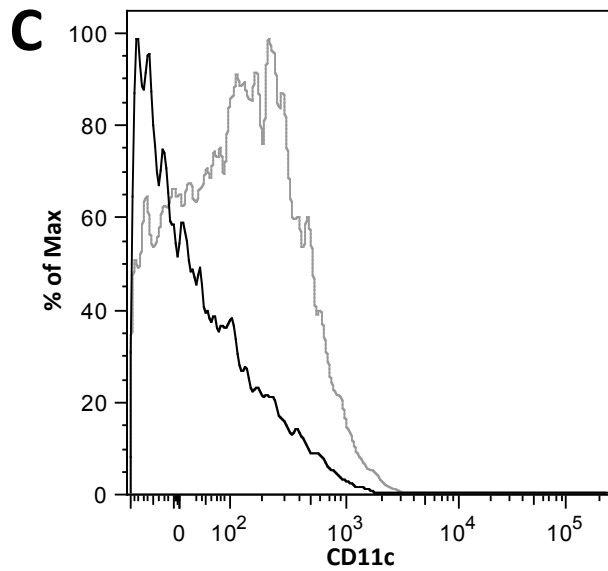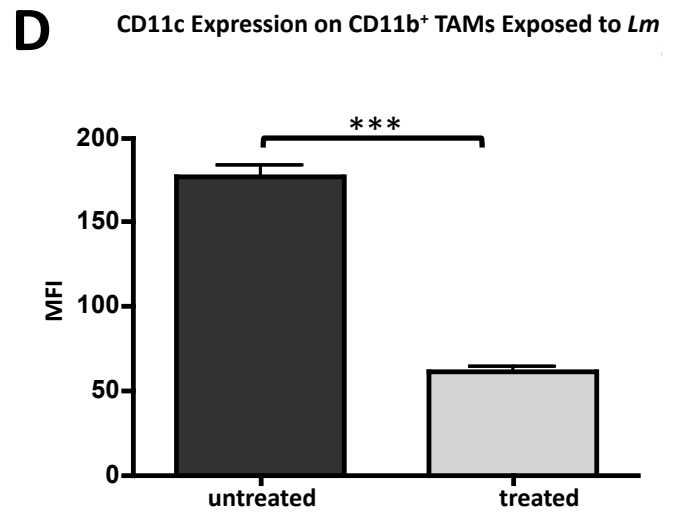

**Supplementary Figure S2.** *Lm* treatment induces downregulation of CD11c surface expression on CD45<sup>+</sup>CD11b<sup>+</sup> TAMs. (A-B) representative FACS plots of CD45<sup>+</sup>CD11b<sup>+</sup> TAMs showing marked loss of CD11c expression following treatment with *Lm ex vivo*. (C) histogram displaying MFI for CD11c on untreated (dashed gray) and *Lm*-treated (solid black) CD45<sup>+</sup>CD11b<sup>+</sup> TAMs. (D) quantification of multiple replicates of panel (C).

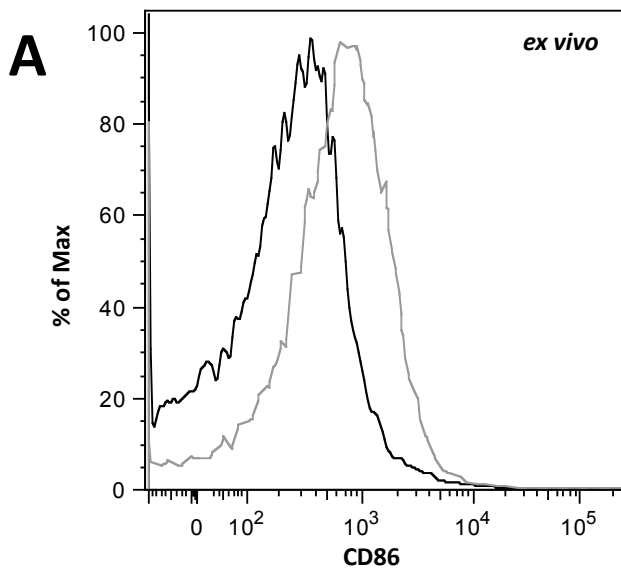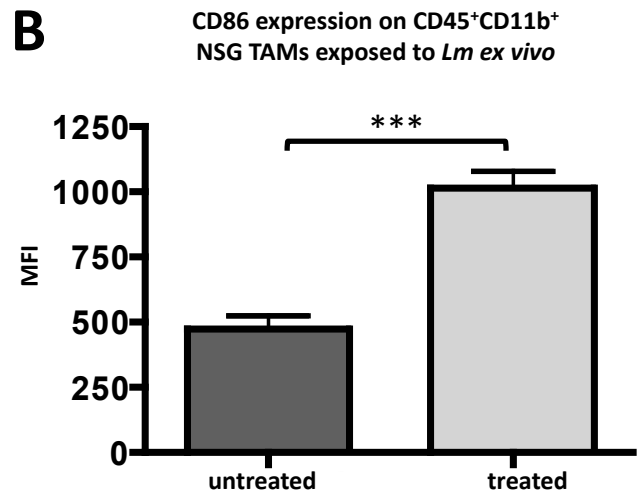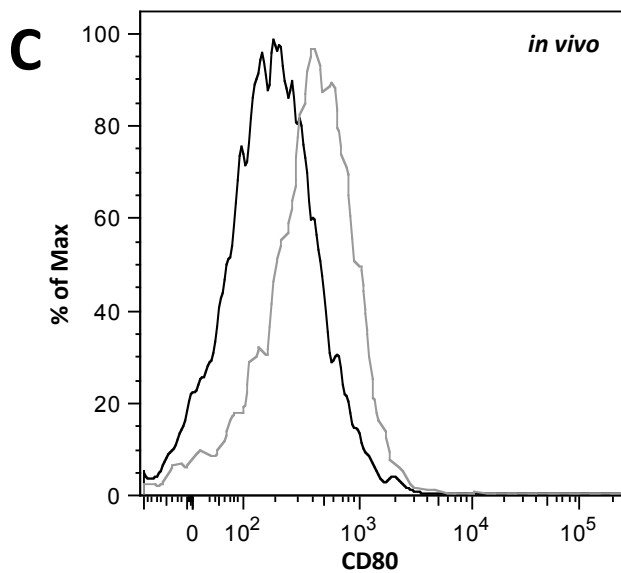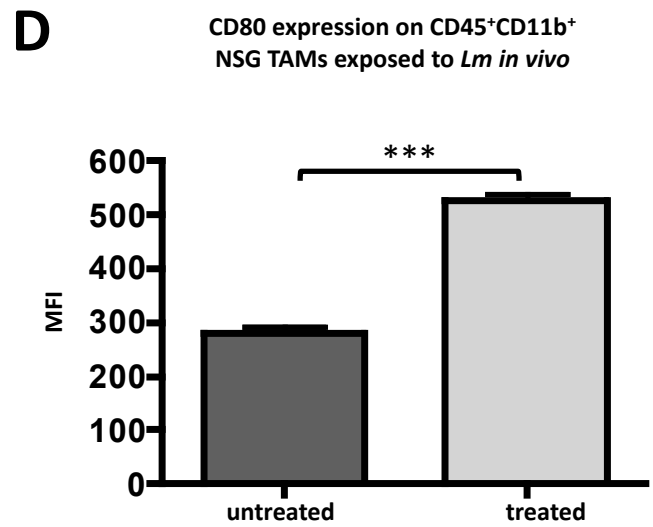

**Supplementary Figure S3.** *Lm* treatment induces upregulation of costimulatory surface markers on CD45<sup>+</sup>CD11b<sup>+</sup> TAMs from NOD/scid/IL2R- $\gamma^{-/-}$  mice both *ex vivo* and *in vivo*. (**A-B**) representative FACS histograms and bar graph of CD45<sup>+</sup>CD11b<sup>+</sup> TAMs from NSG mice showing increase in CD86 expression following treatment of bulk ascites *ex vivo* with *Lm* (light grey) at MOI of 1, relative to untreated (dark grey). (**C-D**) representative FACS histograms and bar graph of CD45<sup>+</sup>CD11b<sup>+</sup> TAMs showing increase in *in vivo* CD80 expression following treatment of NSG mice IP with  $10^7$  *Lm* (light grey) relative to untreated (dark grey).

A

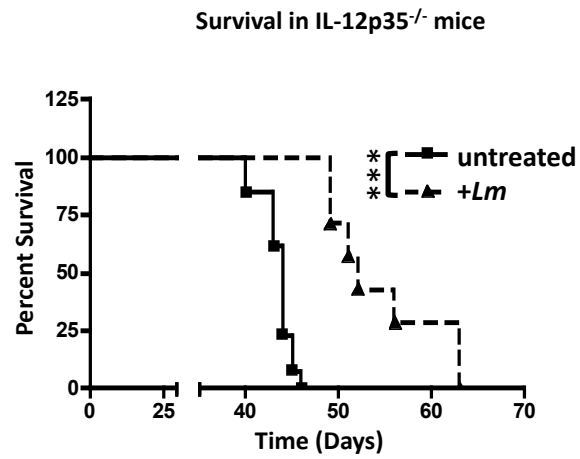

**Supplementary Figure S4.** The observed survival from *Lm* treatment in ID8-*Defb29/Vegf-A*-challenged C57BL/6J mice is not dependent on the ability of mice to produce IL-12.

**A**

|      |      |                 |
|------|------|-----------------|
| 95°C | 3:00 | initial melting |
| 95°C | 0:10 | repeat 35X      |
| 55°C | 0:10 |                 |
| 72°C | 0:30 |                 |
| 95°C | 0:10 | final extension |

**B**

| Gene          | Forward Primer        | Reverse Primer       |
|---------------|-----------------------|----------------------|
| Gapdh         | TGAAGCAGGCATCTGAGGG   | CGAAGGTGGAAGAGTGGGAG |
| Tgf- $\beta$  | GGACTCTCCACCTGCAAGAC  | GACTGGCGAGCCTTAGTTTG |
| Ido           | AATCAAAGCAATCCCCACTG  | AAAAACGTGTCTGGGTCCAC |
| Vista         | AGGACAGTGACAGCATCACG  | AGGCCACCTGTCTCTGCTTA |
| Arg-1         | AAAGCTGGTCTGCTGGAAAA  | ACAGACCGTGGGTTCTTCAC |
| RANKL         | GCAGAAGGAACTGCAACACA  | GATGGTGAGGTGTGCAAATG |
| Mmp7          | AGCTATGCAGCTCACCTGT   | GAGCCTGTTCCCACTGATGT |
| Tnf- $\alpha$ | TAGCCAGGAGGGAGAACAGA  | TTTTCTGGAGGGAGATGTGG |
| Il-1 $\beta$  | CCCAAGCAATACCCAAAGAA  | GCTTGTGCTCTGCTTGTGAG |
| Il-6          | CCGGAGAGGAGACTTCACAG  | TCCACGATTTCCAGAGAAC  |
| Il-12         | CTCCTGTGGGAGAAGCAGAC  | CAGATAGCCCATCACCTGT  |
| Cxcl10        | TCCTTGTCCCTCCCTAGCTCA | ATAACCCCTTGGGAAGATGG |
| Nos2          | TGGTGGTGACAAGCACATTT  | AAGGCCAAACACAGCATACC |

**Supplementary Figure S5.** qRT-PCR information. **(A)** cycling parameters for q-PCR machine utilized for mRNA expression analysis. **(B)** primer sequences used for q-PCR. Primers predicted using consensus mRNA sequences as presented on UCSC Genome Browser and Primer3 v.0.4.0 software from the Whitehead Institute.<sup>32</sup>

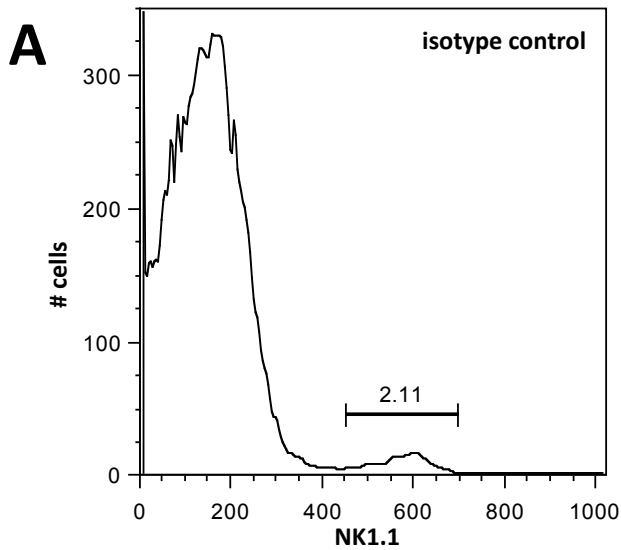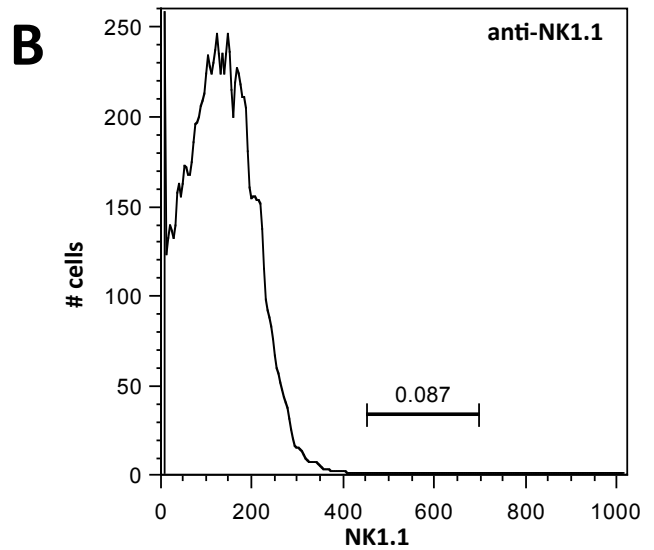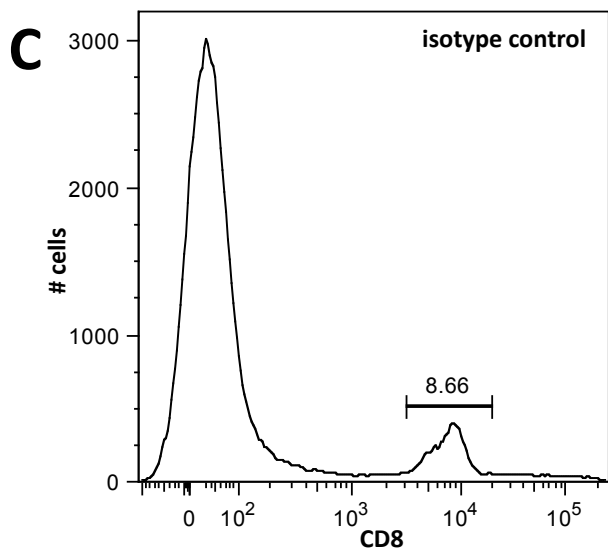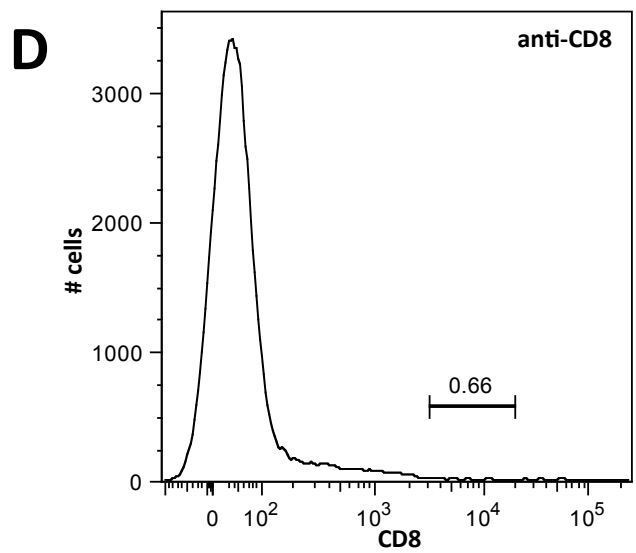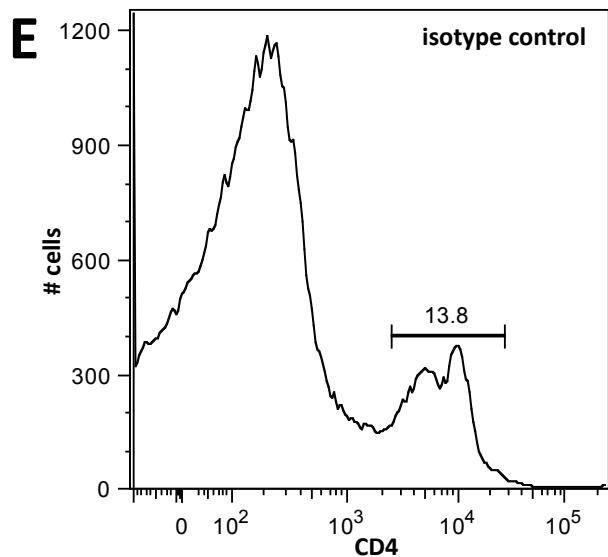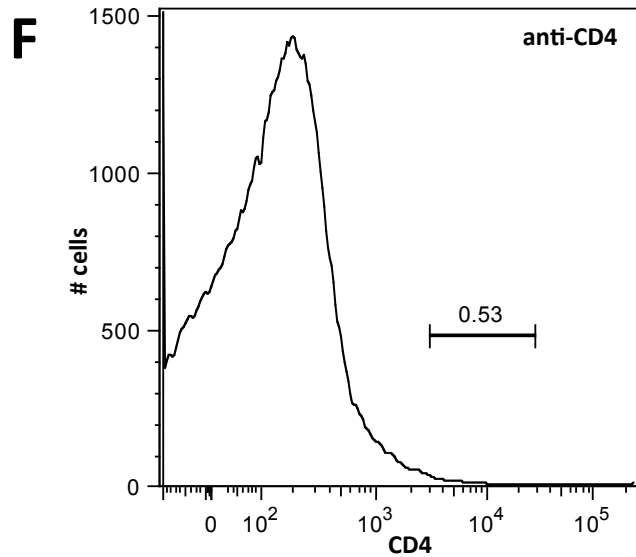

**Supplementary Figure S6.** Lymphocyte depletion validation. (A-B) histograms of splenocytes from isotype treated mice (A) compared to anti-NK1.1 depleted (B). (C-D) histograms of splenocytes from isotype treated mice (C) compared to anti-CD8b depleted (D). (E-F) histograms of splenocytes from isotype treated mice (E) compared to anti-CD4 depleted (F). C57BL/6 splenocytes harvested 24hr post-IP injection.
